# Supplementary material for: Anionic Anchoring Enhanced Quasi Solid Composite Polymer Electrolytes for High Performance Lithium Metal Battery
Source: MDPI journal article supplement (doi:10.3390/polym15244716), 2023-12-15
Supplement: s1 [file s1]

## Supporting information

Article

# Anionic Anchoring Enhanced Quasi Solid Composite Polymer Electrolytes for High Performance Lithium Metal Battery

Ruliang Liu \*, Xinyi Lai, Jiaqi Xue, Haiping Chen, Lijun Xie \*, Yanxuan Qiu and Wei Yin

School of Chemistry and Materials Science, Guangdong University of Education, Guangzhou 510303, China; 13798943464@163.com (X.L.); 17652806905@163.com (J.X.); 18319168585@163.com (H.C.); qiuyanxuan@gdei.edu.cn (Y.Q.); yinwei@gdei.edu.cn (W.Y.)  
\* Correspondence: liuruliang0402@163.com (R.L.); lijunxie@gdei.edu.cn (L.X.)

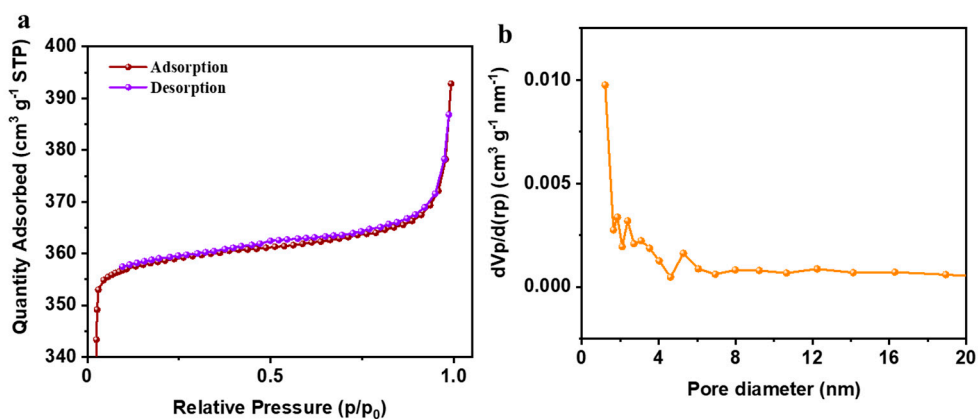

Figure S1. (a) N<sub>2</sub> adsorption desorption curves of ZIF-8 (0.6) and (b) pore size distribution of ZIF-8 (0.6).

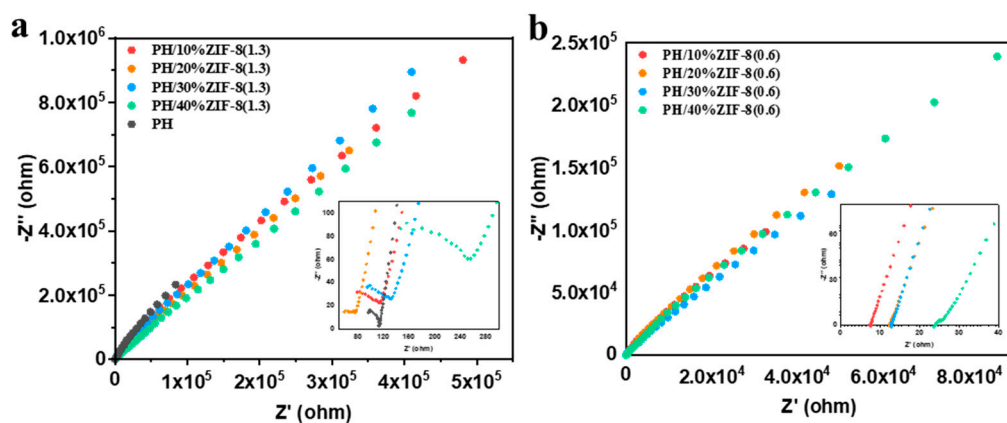

Figure S2. Impedance spectra of (a) PH membrane, PH/x%ZIF-8 (1.3) membrane, and (b) PH/x%ZIF-8 (0.6) membrane at 30 °C.

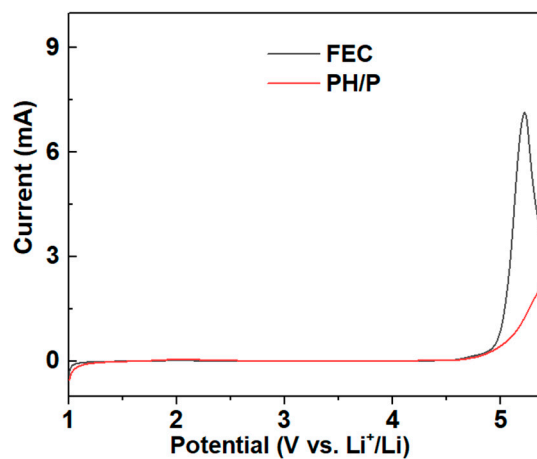

Figure S3. LSV curves for FEC plasticizer and PH/P at a scan rate of  $1 \text{ mV s}^{-1}$ .

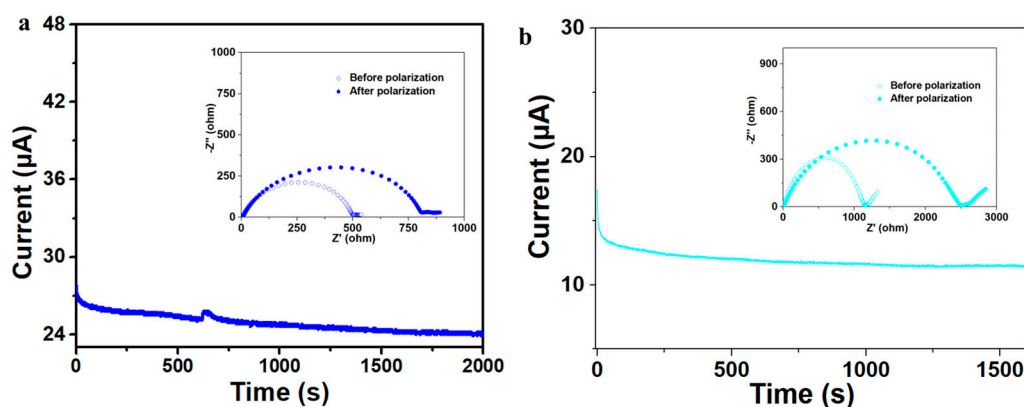

Figure S4. Chronoamperometry profiles of Li/Li symmetric cell with (a) PH/P membrane and (b) PH membrane at 10 mV of polarization (inset: impedance spectra before and after polarization).
